# Supplementary material
Source: PubMed Central journal article supplement (PMC3040417)
Supplement: NIHMS258809-supplement-01.pdf [file NIHMS258809-supplement-01.pdf]

## Transcript

|            | <b>CG ID</b> | <b>Forward Primer</b>       | <b>Reverse Primer</b>         | <b>Probe</b> |
|------------|--------------|-----------------------------|-------------------------------|--------------|
| Punch-RB   | CG9441       | cagccaaacatcaactccaa        | atdddggccactgccattd           | 45           |
| Punch-RA/C | CG9441       | acaccgagtacatcgaca          | tgtggtccagctccaggt            | 31           |
| Pale       | CG10118      | gttcgccatcaagaaatcct        | ctcgaaacgggcatcatc            | 64           |
| Tbh-RB     | CG1543       | cgcttgtdttdgtgtdttdgtgtdttd | tcactaatagccaaacacttdttdgaaat | 66           |
| Ddc        | CG10697      | tctggagaatatacgcgaaagg      | cacttdctccggcttdctcg          | 89           |
| Tbp        | CG9874       | acaggggcaaagagtgagg         | cttaaagtcgaggaacttdtgag       | 109          |

**Supplemental Table 1.** Primers and probes used for qRT-PCR analysis.
